# Supplementary material
Source: MDPI journal article supplement (https://www.mdpi.com/2079-6412/14/3/285)
Supplement: s1 [file s1]

# Supplementary Materials: Influence of Organic Coating Thickness on Electrochemical Impedance Spectroscopy Response

Amanda Suellen de Paula <sup>1</sup>, Barbara Mitraud Aroeira <sup>1</sup>, Lucas Henrique de Oliveira Souza <sup>2</sup>, Alisson Cristian da Cruz <sup>1</sup>, Michele Fedel <sup>3</sup>, Brunela Pereira da Silva <sup>1,\*</sup> and Fernando Cotting <sup>1</sup>

- <sup>1</sup> Department of Chemical Engineering, Federal University of Minas Gerais, Belo Horizonte 31270-901, MG, Brazil; amandasuellenpaula@gmail.com (A.S.d.P.); bah.mitraud@gmail.com (B.M.A.); alissoncristian@gmail.com (A.C.d.C.); fernando@deq.ufmg.br (F.C.)
- <sup>2</sup> Nuclear Technology Development Center, Minas Gerais, Belo Horizonte 31270-901, MG, Brazil; henrrikelucas@gmail.com
- <sup>3</sup> Department of Industrial Engineering, University of Trento, Via Sommarive n. 9, 38123 Trento, Italy; michele.fedel@unitn.it
- \* Correspondence: brunelapereira@gmail.com

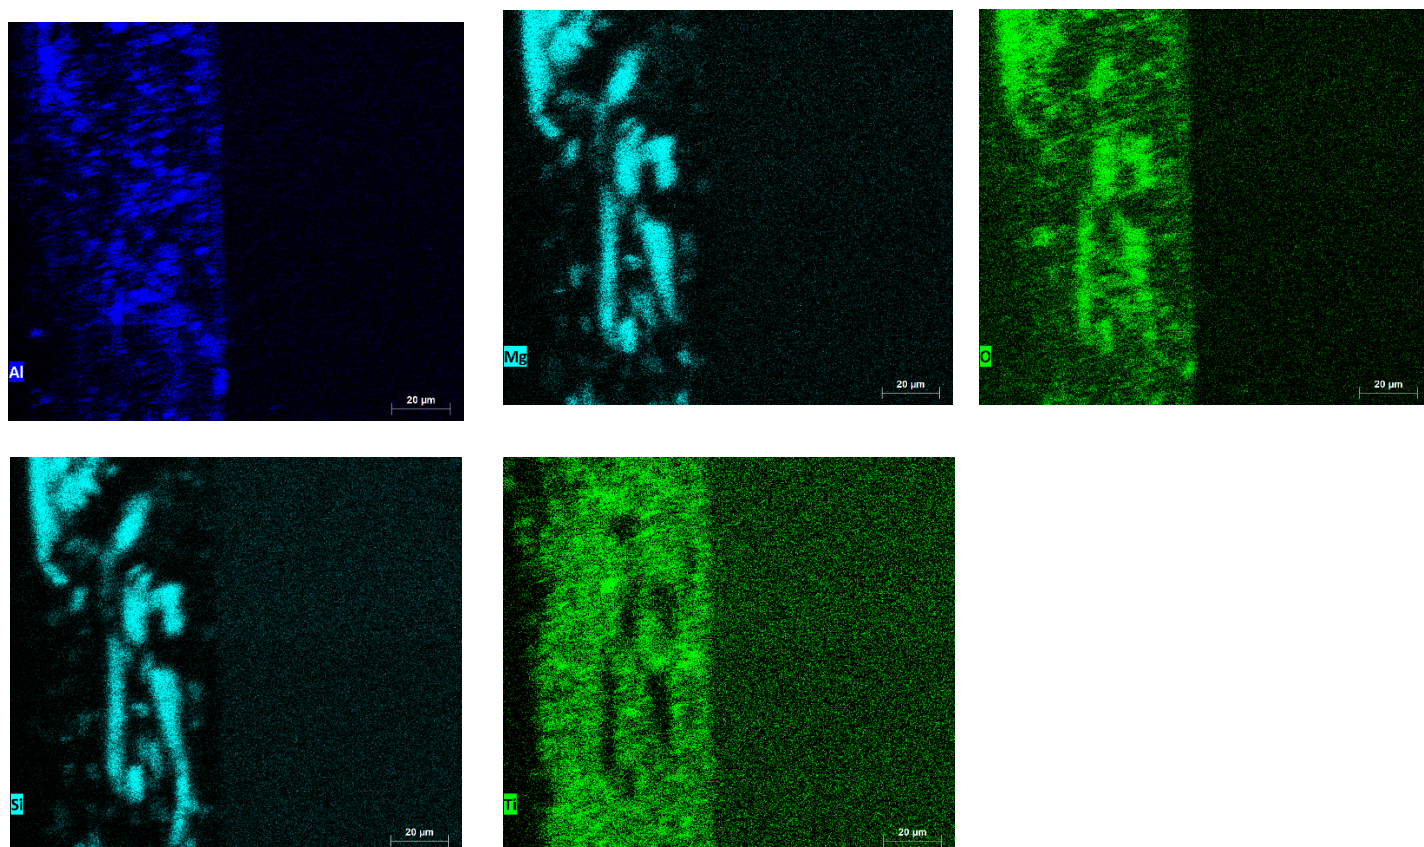

**Figure S1:** Chemical maps of each element in the commercial epoxy coating for the sample C50 (50 µm thicknesses).

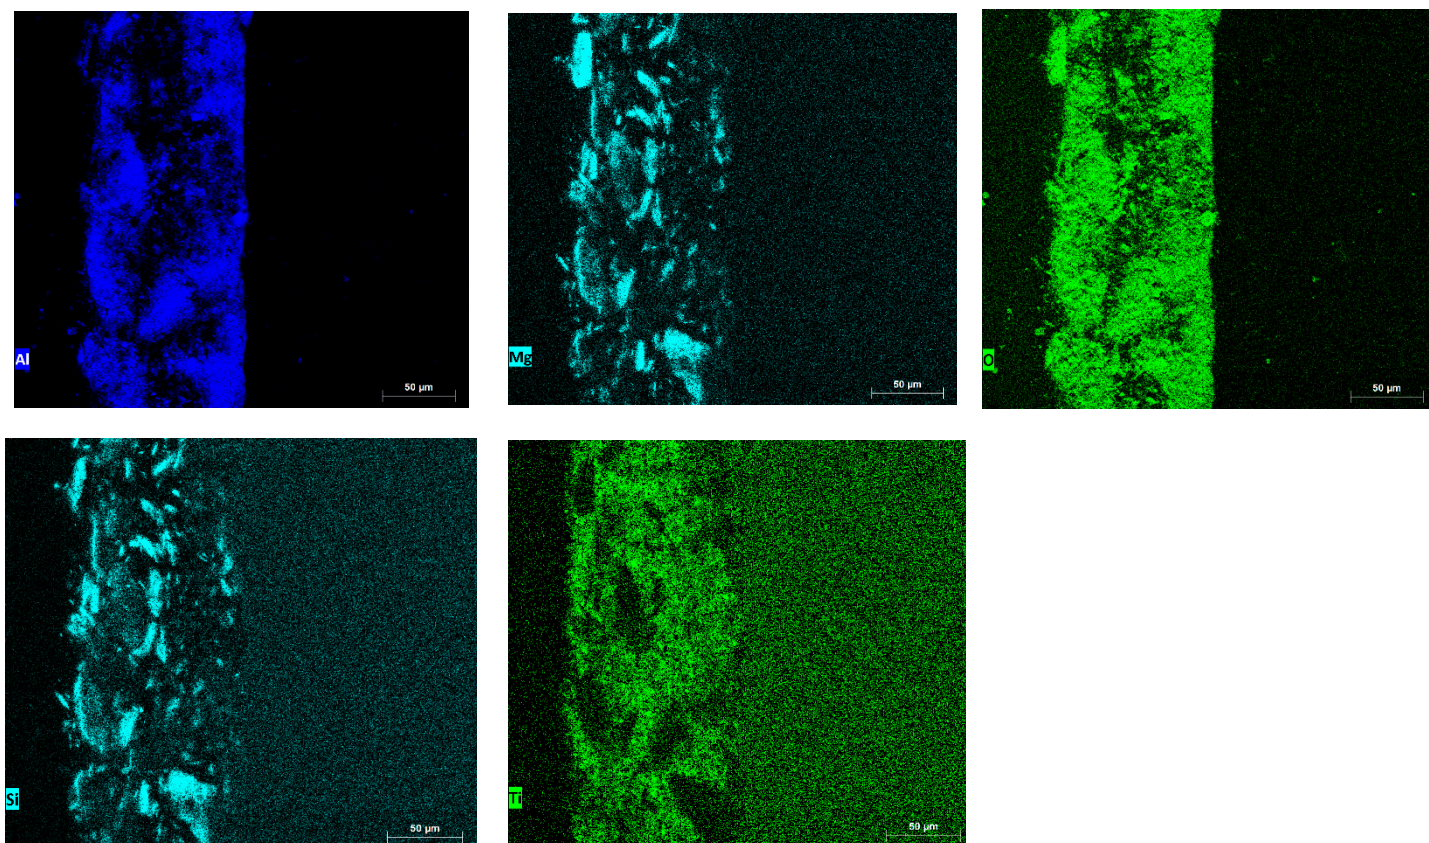

**Figure S2:** Chemical maps of each element in the commercial epoxy coating for the sample C80 (80 µm thicknesses).
